# Supplementary material for: Enhancement of electrochromic properties using nanostructured amorphous tungsten trioxide thin films
Source: Royal Society of Chemistry journal article supplement (doi:10.1039/d2ra06472c), 2022-01-01
Supplement: d2ra06472c1.pdf [file d2ra06472c1.pdf]

## Supplementary Information

# Enhancement of Electrochromic Properties Using Nanostructured Amorphous Tungsten Trioxide Thin Films

Cheong-Ha Kim,<sup>a, b</sup> Yu-Sung Kim,<sup>a</sup> Jin-Young Choi,<sup>a</sup> In-Sik Lee,<sup>a</sup> Byung-Chul Cha,<sup>a</sup> Dae-  
Wook Kim\*<sup>a</sup> and Jewon Lee\*<sup>b</sup>

<sup>a</sup> Advanced Manufacturing Process R&D Group, Ulsan Regional Division, Korea Institute of  
Industrial Technology (KITECH), 55, Jongga-ro, Jung-gu, Ulsan, 44313, Korea

<sup>b</sup> Department of Nanoscience and Engineering, Inje University, Gimhae, Gyeongnam, 50834, Korea

\* Correspondence for materials should be addressed to D.W. Kim (dwkim@kitech.re.kr) or J.W. Lee (jwlee@inje.ac.kr)

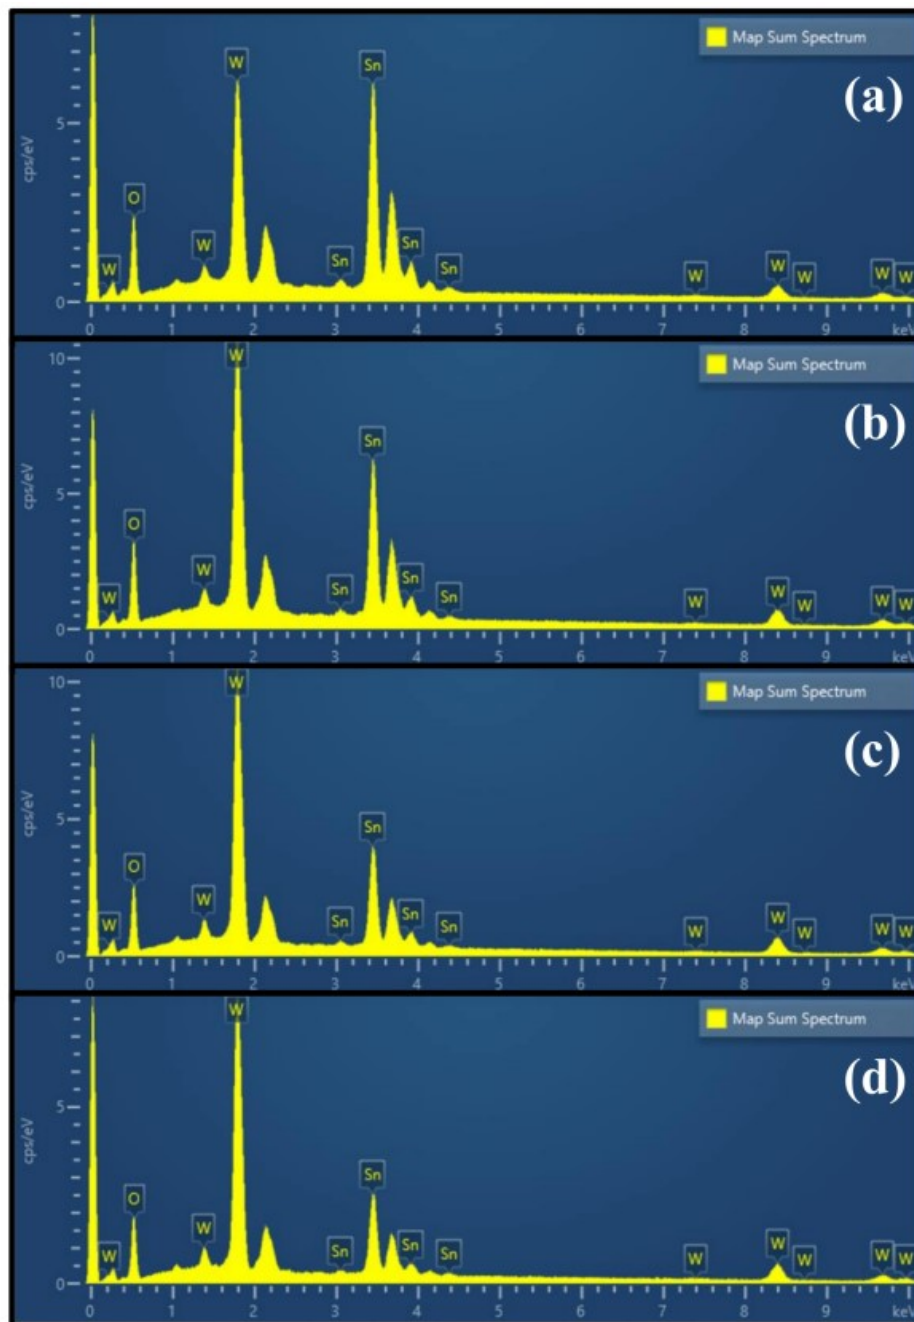

**Fig. S1.** EDS spectra of the (a) pH1.8WO<sub>3</sub>, (b) pH1.6WO<sub>3</sub>, (c) pH1.4WO<sub>3</sub>, and (d) pH1.2WO<sub>3</sub>

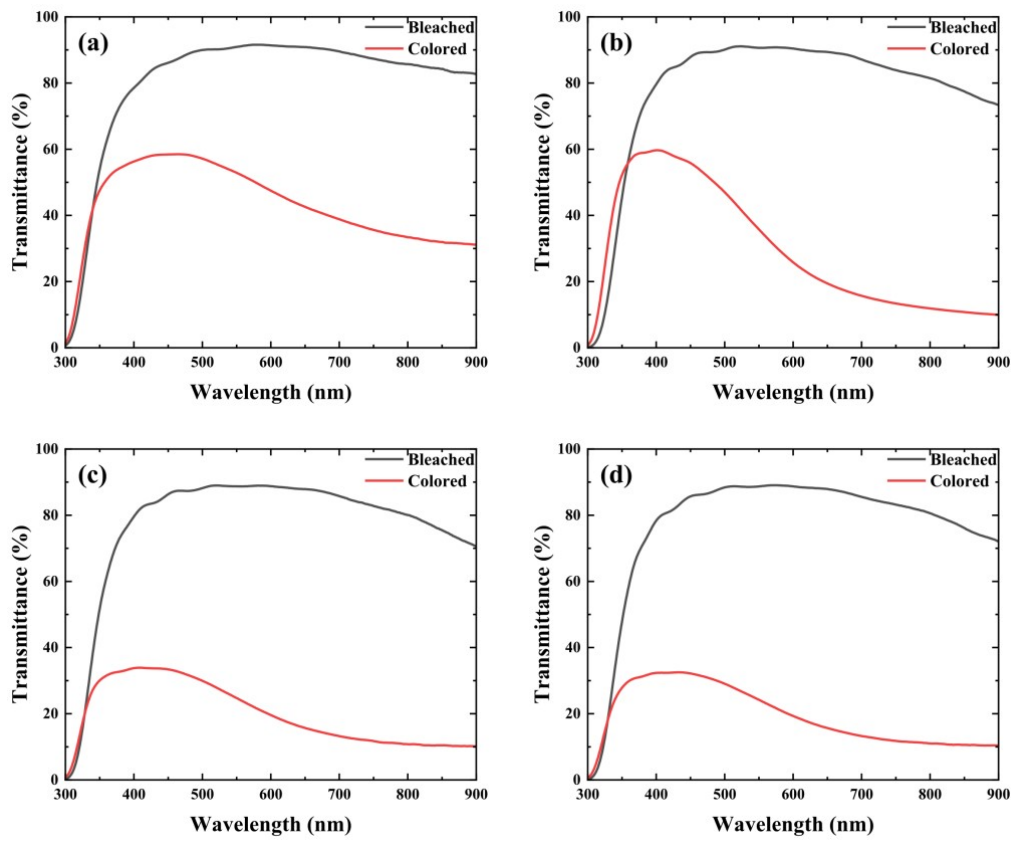

**Fig. S2.** Transmittance spectra of the WO<sub>3</sub> films (a) pH1.8WO<sub>3</sub>, (b) pH1.6WO<sub>3</sub>, (c) pH1.4WO<sub>3</sub>, and (d) pH1.2WO<sub>3</sub> measured at -1V (colored state) and 1V (bleached state) between the wavelength range of 300 and 900nm.
